# Supplementary material
Source: Springer Nature journal article supplement (https://www.springermedizin.de/resource/supplementary/12885_2008_1096_MOESM4_ESM.pdf/9471106)

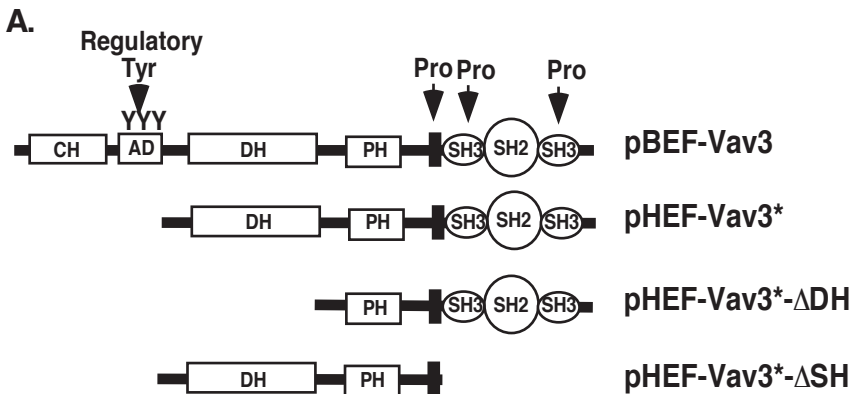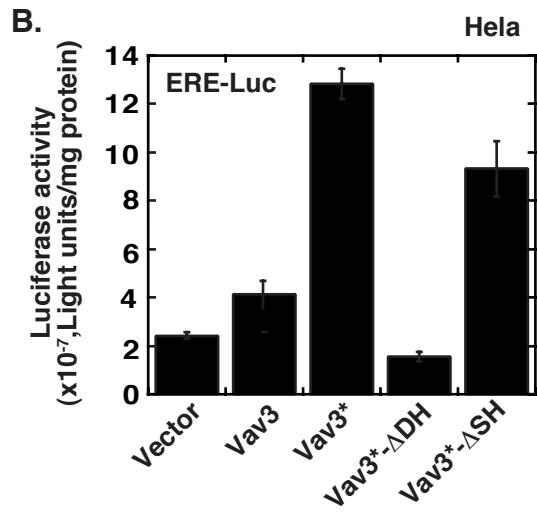

Supplement: MOESM4 [file 9471106]
